# Supplementary material for: Global datasets of hourly carbon and water fluxes simulated using a satellite-based process model with dynamic parameterizations
Source: Copernicus journal article supplement (doi:10.5194/essd-16-1283-2024), 2024-03-13
Supplement: Supplementary file 1 [file essd-16-1283-2024-supplement.pdf]

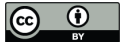

*Supplement of*

## **Global datasets of hourly carbon and water fluxes simulated using a satellite-based process model with dynamic parameterizations**

**Jiye Leng et al.**

*Correspondence to:* Jing M. Chen ([jing.chen@utoronto.ca](mailto:jing.chen@utoronto.ca))

The copyright of individual parts of the supplement might differ from the article licence.

**1. List of the studied sites in the FLUXNET2015 datasets for site-level estimates of  $m$  and  $V_{cmax}^{25}$ .**

**Table S1.** Main characteristics and studied periods of flux sites in this study, obtained from <https://fluxnet.org/data/fluxnet2015-dataset/>

| Site Name | IGBP | Year                  | Lat      | Lon       |
|-----------|------|-----------------------|----------|-----------|
| BE-Lon    | CRO  | 2005-2014             | 50.5516  | 4.7461    |
| CH-Oe2    | CRO  | 2004-2014             | 47.2863  | 7.7343    |
| DE-Geb    | CRO  | 2002-2014             | 51.1001  | 10.9143   |
| DE-Kli    | CRO  | 2005-2014             | 50.8931  | 13.5224   |
| DE-Seh    | CRO  | 2008-2009             | 50.8706  | 6.4497    |
| FI-Jok    | CRO  | 2001                  | 60.8986  | 23.5135   |
| FR-Gri    | CRO  | 2006-2011             | 48.8442  | 1.9519    |
| IT-BCi    | CRO  | 2005-2007, 2013-2014  | 40.5238  | 14.9574   |
| IT-CA2    | CRO  | 2012-2014             | 42.3772  | 12.0260   |
| US-ARM    | CRO  | 2003--2012            | 36.6058  | -97.4888  |
| US-CRT    | CRO  | 2011-2014             | 41.6285  | -83.3471  |
| US-Tw3    | CRO  | 2014                  | 38.1159  | -121.6467 |
| IT-Noe    | SH   | 2004-2014             | 40.6062  | 8.1512    |
| US-KS2    | SH   | 2004-2006             | 28.6086  | -80.6715  |
| CA-TPD    | DBF  | 2012-2014             | 42.6353  | -80.5577  |
| DE-Hai    | DBF  | 2000-2011             | 51.0792  | 10.4530   |
| DE-Lnf    | DBF  | 2003-2006, 2010-2012  | 51.3282  | 10.3678   |
| DK-Sor    | DBF  | 2000, 2002-2014       | 55.4859  | 11.6446   |
| IT-CA3    | DBF  | 2012-2014             | 42.3800  | 12.0222   |
| IT-Col    | DBF  | 2005-2014             | 41.8494  | 13.5881   |
| IT-Isp    | DBF  | 2013-2014             | 45.8126  | 8.6336    |
| IT-PT1    | DBF  | 2003-2004             | 45.2009  | 9.0610    |
| IT-Ro1    | DBF  | 2001-2008             | 42.4081  | 11.9300   |
| IT-Ro2    | DBF  | 2002-2008, 2010, 2012 | 42.3903  | 11.9209   |
| JP-MBF    | DBF  | 2004-2005             | 44.3869  | 142.3186  |
| PA-SPn    | DBF  | 2008                  | 9.3181   | -79.6346  |
| US-MMS    | DBF  | 2000-2014             | 39.3232  | -86.4131  |
| US-Oho    | DBF  | 2004-2013             | 41.5545  | -83.8438  |
| US-UMB    | DBF  | 2002-2014             | 45.5598  | -84.7138  |
| US-UMd    | DBF  | 2008-2013             | 45.5625  | -84.6975  |
| US-WCr    | DBF  | 2000-2006, 2011-2014  | 45.8059  | -90.0799  |
| ZM-Mon    | DBF  | 2007-2008             | -15.4378 | 23.2528   |
| AU-Tum    | EBF  | 2002-2014             | -35.6566 | 148.1517  |
| AU-Wac    | EBF  | 2006-2008             | -37.4259 | 145.1878  |
| AU-Whr    | EBF  | 2012-2014             | -36.6732 | 145.0294  |

|        |     |                      |          |           |
|--------|-----|----------------------|----------|-----------|
| AU-Wom | EBF | 2011-2014            | -37.4222 | 144.0944  |
| BR-Sa3 | EBF | 2001-2003            | -3.0180  | -54.9714  |
| CN-Din | EBF | 2003-2005            | 23.1733  | 112.5361  |
| GF-Guy | EBF | 2004-2014            | 5.2788   | -52.9249  |
| GH-Ank | EBF | 2012, 2014           | 5.2685   | -2.6942   |
| IT-Cpz | EBF | 2001-2008            | 41.7053  | 12.3761   |
| MY-PSO | EBF | 2003-2009            | 2.9730   | 102.3062  |
| AU-ASM | ENF | 2011-2014            | -22.2830 | 133.2490  |
| CA-NS1 | ENF | 2003-2004            | 55.8792  | -98.4839  |
| CA-NS2 | ENF | 2003-2004            | 55.9058  | -98.5247  |
| CA-NS3 | ENF | 2003-2004            | 55.9117  | -98.3822  |
| CA-NS4 | ENF | 2003-2004            | 55.9144  | -98.3806  |
| CA-Qfo | ENF | 2004-2010            | 49.6925  | -74.3421  |
| CA-SF1 | ENF | 2004-2005            | 54.4850  | -105.8176 |
| CA-SF2 | ENF | 2002-2004            | 54.2539  | -105.8775 |
| CA-TP1 | ENF | 2003-2014            | 42.6609  | -80.5595  |
| CA-TP2 | ENF | 2003-2007            | 42.7744  | -80.4588  |
| CH-Dav | ENF | 2007-2012, 2014      | 46.8153  | 9.8559    |
| CN-Qia | ENF | 2003-2005            | 26.7414  | 115.0581  |
| CZ-BK1 | ENF | 2011-2013            | 49.5021  | 18.5369   |
| DE-Lkb | ENF | 2010-2013            | 49.0996  | 13.3047   |
| DE-Obe | ENF | 2010-2014            | 50.7867  | 13.7213   |
| DE-Tha | ENF | 2000-2014            | 50.9624  | 13.5652   |
| FI-Hyy | ENF | 2000-2002, 2004-2013 | 61.8474  | 24.2948   |
| FI-Sod | ENF | 2001-2006, 2011-2014 | 67.3624  | 26.6386   |
| FR-LBr | ENF | 2005-2008            | 44.7171  | -0.7693   |
| IT-Lav | ENF | 2005-2014            | 45.9562  | 11.2813   |
| IT-Ren | ENF | 2002-2003, 2005-2014 | 46.5869  | 11.4337   |
| IT-SR2 | ENF | 2014                 | 43.7320  | 10.2910   |
| IT-SRo | ENF | 2003-2012            | 43.7279  | 10.2844   |
| NL-Loo | ENF | 2000-2014            | 52.1666  | 5.7436    |
| RU-Fyo | ENF | 2007-2014            | 56.4615  | 32.9221   |
| US-Blo | ENF | 2000-2006            | 38.8953  | -120.6328 |
| US-GLE | ENF | 2005-2013            | 41.3665  | -106.2399 |
| US-Me2 | ENF | 2002-2014            | 44.4523  | -121.5574 |
| US-Me3 | ENF | 2004-2008            | 44.3154  | -121.6078 |
| US-Me5 | ENF | 2000-2002            | 44.4372  | -121.5668 |
| US-Me6 | ENF | 2011                 | 44.3233  | -121.6078 |
| US-NR1 | ENF | 2002-2014            | 40.0329  | -105.5464 |
| AT-Neu | GRA | 2003-2012            | 47.1167  | 11.3175   |
| AU-DaP | GRA | 2008-2012            | -14.0633 | 131.3181  |
| AU-Emr | GRA | 2012-2013            | -23.8587 | 148.4746  |
| AU-Rig | GRA | 2011-2014            | -36.6499 | 145.5759  |
| AU-Stp | GRA | 2009-2014            | -17.1507 | 133.3502  |

|        |     |                      |          |           |
|--------|-----|----------------------|----------|-----------|
| AU-Ync | GRA | 2013-2014            | -34.9893 | 146.2907  |
| CH-Cha | GRA | 2006-2014            | 47.2102  | 8.4104    |
| CH-Fru | GRA | 2006-2014            | 47.1158  | 8.5378    |
| CH-Oe1 | GRA | 2003-2007            | 47.2858  | 7.7319    |
| CN-Cng | GRA | 2008-2009            | 44.5934  | 123.5092  |
| CN-Dan | GRA | 2004-2005            | 30.4978  | 91.0664   |
| CN-HaM | GRA | 2002-2004            | 37.3700  | 101.1800  |
| CN-Sw2 | GRA | 2011                 | 41.7902  | 111.8971  |
| CZ-BK2 | GRA | 2007-2012            | 49.4944  | 18.5429   |
| DE-Gri | GRA | 2007-2014            | 50.9500  | 13.5126   |
| DK-Eng | GRA | 2006-2007            | 55.6905  | 12.1918   |
| DK-ZaH | GRA | 2001-2004            | 74.4733  | -20.5503  |
| IT-MBo | GRA | 2005-2013            | 46.0147  | 11.0458   |
| IT-Tor | GRA | 2009-2014            | 45.8444  | 7.5781    |
| NL-Hor | GRA | 2007-2010            | 52.2404  | 5.0713    |
| PA-SPs | GRA | 2008-2009            | 9.3138   | -79.6314  |
| RU-Tks | GRA | 2011-2013            | 71.5943  | 128.8878  |
| US-AR1 | GRA | 2010-2012            | 36.4267  | -99.4200  |
| US-AR2 | GRA | 2010-2011            | 36.6358  | -99.5975  |
| US-Goo | GRA | 2003-2006            | 34.2547  | -89.8735  |
| US-IB2 | GRA | 2005-2011            | 41.8406  | -88.2410  |
| US-SRG | GRA | 2009-2014            | 31.7894  | -110.8277 |
| US-Var | GRA | 2001-2014            | 38.4133  | -120.9507 |
| US-Wkg | GRA | 2005-2014            | 31.7365  | -109.9419 |
| AR-SLu | MF  | 2010                 | -33.4648 | -66.4598  |
| BE-Vie | MF  | 2000-2014            | 50.3050  | 5.9981    |
| CH-Lae | MF  | 2005-2014            | 47.4781  | 8.3650    |
| CN-Cha | MF  | 2003-2005            | 42.4025  | 128.0958  |
| JP-SMF | MF  | 2003-2006            | 35.2617  | 137.0788  |
| US-PFa | MF  | 2000-2014            | 45.9459  | -90.2723  |
| US-Syv | MF  | 2002-2007, 2012-2014 | 46.2420  | -89.3477  |
| AU-TTE | SH  | 2013-2014            | -22.2870 | 133.6400  |
| CA-NS6 | SH  | 2003-2004            | 55.9167  | -98.9644  |
| CA-NS7 | SH  | 2003-2004            | 56.6358  | -99.9483  |
| CA-SF3 | SH  | 2002-2005            | 54.0916  | -106.0053 |
| ES-Amo | SH  | 2008-2012            | 36.8336  | -2.2523   |
| ES-LgS | SH  | 2007                 | 37.0979  | -2.9658   |
| ES-LJu | SH  | 2005-2013            | 36.9266  | -2.7521   |
| US-SRC | SH  | 2009-2013            | 31.9083  | -110.8395 |
| US-Sta | SH  | 2008                 | 41.3966  | -106.8024 |
| US-Whs | SH  | 2008-2014            | 31.7438  | -110.0522 |
| AU-Cpr | SAV | 2013-2014            | -34.0021 | 140.5891  |
| AU-DaS | SAV | 2008-2014            | -14.1593 | 131.3881  |
| AU-Dry | SAV | 2009-2014            | -15.2588 | 132.3706  |

|        |     |           |          |           |
|--------|-----|-----------|----------|-----------|
| AU-GWW | SAV | 2013-2014 | -30.1913 | 120.6541  |
| SD-Dem | SAV | 2007-2009 | 13.2829  | 30.4783   |
| SN-Dhr | SAV | 2011-2013 | 15.4028  | -15.4322  |
| ZA-Kru | SAV | 2001-2012 | -25.0197 | 31.4969   |
| AU-Fog | WET | 2007      | -12.5452 | 131.3072  |
| CN-Ha2 | WET | 2003-2005 | 37.6086  | 101.3269  |
| FI-Lom | WET | 2008-2009 | 67.9972  | 24.2092   |
| AU-Ade | WSA | 2008      | -13.0769 | 131.1178  |
| AU-Gin | WSA | 2012-2014 | -31.3764 | 115.7138  |
| AU-How | WSA | 2004-2014 | -12.4943 | 131.1523  |
| AU-RDF | WSA | 2012      | -14.5636 | 132.4776  |
| US-SRM | WSA | 2004-2014 | 31.8214  | -110.8661 |
| US-Ton | WSA | 2002-2014 | 38.4316  | -120.9660 |

## 2. Description of key modules in BEPS

### 2.1 Leaf-level photosynthesis and transpiration

BEPS adopts the Farquhar model (Farquhar et al., 1980) to calculate the leaf-level photosynthetic rate, expressed as:

$$A = \min(W_c, W_j) - R_d \quad (1.)$$

where  $W_c$  is the photosynthetic rate ( $\mu\text{mol m}^{-2} \text{s}^{-1}$ ) under RuBP carboxylase/oxygenase limited conditions,  $W_j$  is the photosynthetic rate under electron transport limited conditions in the RuBP regeneration process, and  $R_d$  is the dark respiration rate.  $W_c$ ,  $W_j$ , and  $R_d$  are calculated as:

$$W_c = V_{cmax} \frac{C_i - \Gamma}{C_i + K} \quad (2.)$$

$$W_j = J \frac{C_i - \Gamma}{4C_i + 8K} \quad (3.)$$

$$R_d = 0.015V_{cmax} \quad (4.)$$

where  $V_{cmax}$  is the maximum carboxylation rate ( $\mu\text{mol m}^{-2} \text{s}^{-1}$ ) calculated from preset  $V_{cmax}^{25}$  and a temperature dependent function (Sharkey et al., 2007),  $J$  is the electron transport rate ( $\mu\text{mol m}^{-2} \text{s}^{-1}$ ),  $C_i$  is the intercellular  $\text{CO}_2$  concentration ( $\mu\text{mol mol}^{-1}$ ),  $\Gamma$  is the  $\text{CO}_2$  compensation point without dark respiration ( $\mu\text{mol mol}^{-1}$ ), and  $K$  is a Rubisco enzyme kinetics function as  $K = K_c / (1 + O_i / K_o)$ .  $K_c$ ,  $K_o$  are Michaelis-Menten constants for  $\text{CO}_2$  ( $\mu\text{mol mol}^{-1}$ ) and  $\text{O}_2$  ( $\text{mmol mol}^{-1}$ ), and  $O_i$  is the intercellular oxygen concentration ( $\text{mmol}$

mol<sup>-1</sup>).  $J$  is a function of PPFD ( $\mu\text{mol m}^{-2} \text{s}^{-1}$ ) and the maximum electron transport rate ( $J_{max}$ ), expressed as:

$$J = J_{max} \times \frac{PPFD}{PPFD + 2.1J_{max}} \quad (5.)$$

and  $J_{max}$  is obtained using the equation by Medlyn et al. (1999):

$$J_{max} = 2.39V_{cmax} - 14.2 \quad (6.)$$

BEPS solves the  $A$  and  $g_s$  using the cubic analytical method (Baldocchi, 1994) by coupling the Farquhar model and the Ball-Woodrow-Berry model (Ball et al., 1987), which is expressed as:

$$g_s = m \cdot A \frac{RH}{C_a} + g_0 \quad (7.)$$

where  $A$  is the photosynthetic rate ( $\text{mol m}^{-2} \text{s}^{-1}$ ),  $RH$  is the relative humidity at the leaf surface (%),  $C_a$  is the CO<sub>2</sub> concentration at the leaf surface ( $\mu\text{mol mol}^{-1}$ ),  $m$  is the slope of linear regression between  $g_s$  and  $A \cdot RH/C_a$  (unitless), and  $g_0$  is the intercept of the regression representing minimum  $g_s$ . The leaf-level transpiration is then calculated by applying the Penman-Monteith equation:

$$T = \frac{\Delta(R_n - G) + \rho c_p VPD g_b}{\lambda \left( \Delta + \left( 1 + \frac{g_b}{g_s} \right) \gamma \right)} \quad (8.)$$

where  $R_n$  is the net radiation on the leaf surface ( $\text{W m}^{-2}$ ),  $G$  is the heat storage of the leaf,  $\rho$  is the density of air ( $\text{kg m}^{-3}$ ),  $c_p$  is the specific heat of air ( $\text{J kg}^{-1} \text{ }^\circ\text{C}^{-1}$ ),  $VPD$  is the vapor pressure deficit on the leaf surface (kPa),  $\Delta$  is the rate of change of saturation specific humidity with air temperature ( $\text{kPa } ^\circ\text{C}^{-1}$ ),  $\lambda$  is the latent heat of water ( $\text{J kg}^{-1}$ ),  $\gamma$  is the psychrometric constant ( $\text{kPa } ^\circ\text{C}^{-1}$ ), and  $g_b$  is the leaf boundary layer resistance to water vapor ( $\text{m s}^{-1}$ ).

## 2.2 Two-level scheme upscaling carbon and water fluxes from leaf to canopy

The canopy can be separated into sunlit and shaded leaf groups based on the first order of the incoming solar radiation on leaves (Chen et al., 1997; Norman, 1982). Sunlit leaves receive both direct and diffuse radiation and shaded leaves only receive diffuse solar radiation. Sunlit and shaded LAI ( $LAI_{sunlit}$  and  $LAI_{shaded}$ ) are calculated in BEPS following the method described in Chen et al. (1999):

$$LAI_{sunlit} = 2\cos\theta \left( 1 - e^{-\frac{0.5\Omega LAI_{total}}{\cos\theta}} \right) \quad (9.)$$

$$LAI_{shaded} = LAI_{total} - LAI_{sunlit} \quad (10.)$$

where  $\theta$  is the solar zenith angle,  $LAI_{total}$  is the total leaf area index of the canopy, and  $\Omega$  is the clumping index. The leaf-level  $A$  and  $T$  are then upscaled to the canopy level ( $GPP$ ,  $T_{total}$ ):

$$GPP = A_{sunlit} \times LAI_{sunlit} + A_{shaded} \times LAI_{shaded} \quad (11.)$$

$$T_{total} = T_{sunlit} \times LAI_{sunlit} + T_{shaded} \times LAI_{shaded} \quad (12.)$$

where  $A_{sunlit}$  and  $T_{sunlit}$  are the instantaneous photosynthetic rate and the transpiration from a sunlit leaf,  $A_{shaded}$  and  $T_{shaded}$  are the instantaneous photosynthetic rate and the transpiration from a shaded leaf. BEPS also simulates evaporation from soil ( $E_{soil}$ ) and from wet leaf surface ( $E_{leaf}$ ):

$$ET = T_{total} + E_{soil} + E_{leaf} \quad (13.)$$

but these two processes,  $E_{soil}$  and  $E_{leaf}$ , are not regulated by stomatal functions and leaf photosynthesis, thus not likely to change much in  $m$  and  $V_{cmax}$  optimizations.

### 3. The parameter optimization algorithm to estimate $m$ and $V_{cmax}^{25}$ in BEPS

The Bayesian parameter optimization has been tested with good accuracy and high efficiency for  $m$  and  $V_{cmax25}$  retrievals in Leng et al. (2024a). With optimized seasonally varied  $m$  and  $V_{cmax}^{25}$ , the estimates of carbon and water fluxes can be significantly improved. In this study, the carbon-water-coupling cost function was adopted to derive  $m$  and  $V_{cmax}^{25}$  at site for each month, which is expressed as:

$$f_{cost} = |1 - a_{GPP_{obs}}^{GPP_{mod}}| \times \frac{1}{N} \sum \left( \frac{GPP_{mod} - GPP_{obs}}{GPP_{obs}} \right)^2 + |1 - a_{ET_{obs}}^{ET_{mod}}| \times \frac{1}{N} \sum \left( \frac{ET_{mod} - ET_{obs}}{ET_{obs}} \right)^2 \quad (14.)$$

where  $GPP_{obs}$  is the observed GPP from fluxes,  $GPP_{mod}$  is the modeled GPP from BEPS,  $ET_{obs}$  is the observed ET from fluxes,  $ET_{mod}$  is the modeled ET from BEPS,  $N$  is the total number of hourly simulations in a parameter optimization interval,  $a_{GPP_{obs}}^{GPP_{mod}}$  is the ordinal

least square regression (OLS) slope between  $GPP_{mod}$  and  $GPP_{obs}$ ,  $a_{ET_{obs}}^{ET_{mod}}$  is the OLS slope between  $ET_{mod}$  and  $ET_{obs}$ .

At site level,  $m$  and  $V_{cmax25}$  were estimated monthly by minimizing the cost function, in which  $m$  was set in range  $[0, 25]$  and  $V_{cmax25}$  was set in range  $[10, 200]$  according to the reported ranges in literature, and the optimized  $m$  and  $V_{cmax25}$  were filtered based on the normal ranges reported in literature, respectively. (Chen et al., 2022; Miner et al., 2017; Smith et al., 2019; Wolz et al., 2017). BEPS was run for 500 times for  $m$  and  $V_{cmax25}$  of each month at each site to get the global optima in the Bayesian parameter optimization.

### 3. Global distributions and seasonal variations of $m$ and $V_{cmax}$

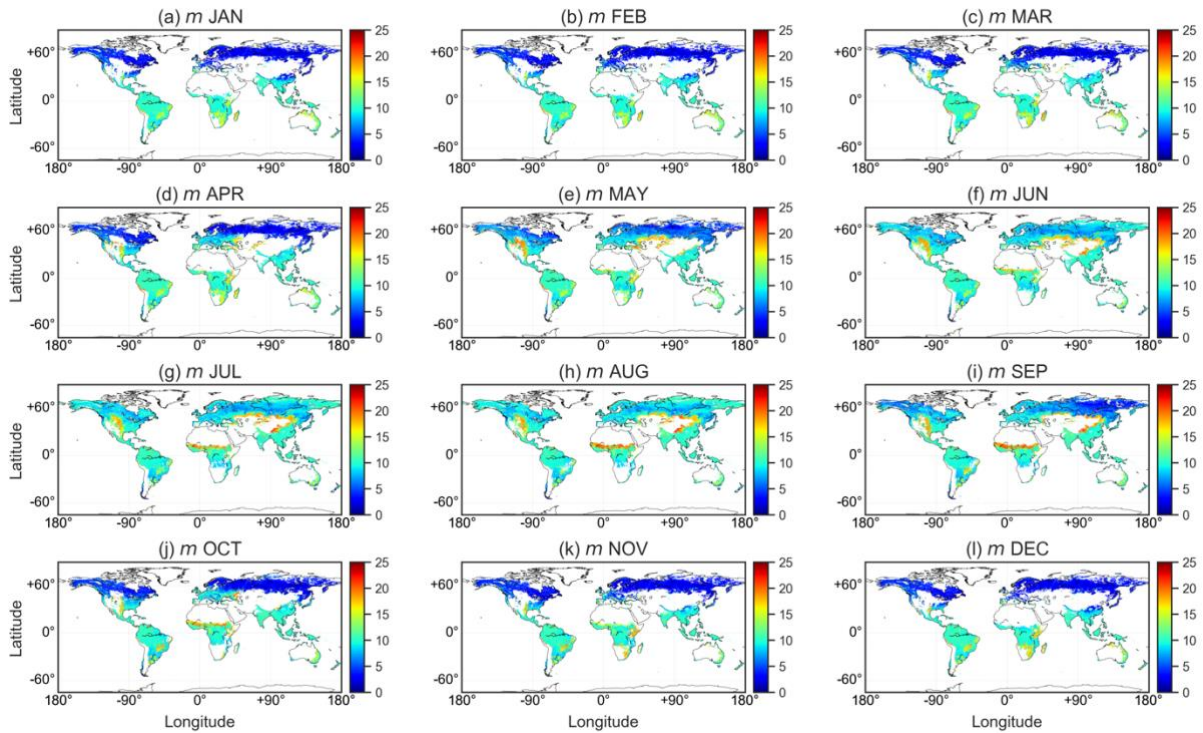

Figure S1. Monthly spatial patterns of global  $m$  during 2001-2020. (a) – (l) averaged from January to December, respectively. Courtesy of Leng et al. (2024b).



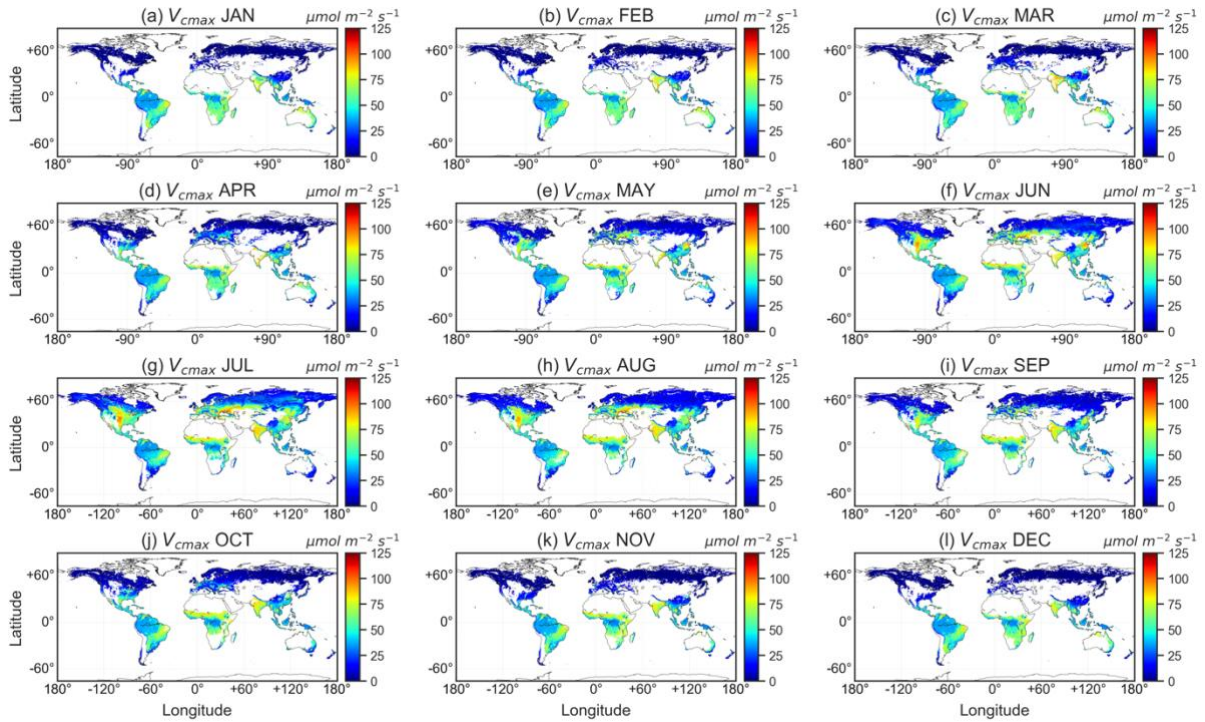

Figure S2. Monthly spatial patterns of global  $V_{cmax}$  during 2001-2020. (a) – (l) averaged from January to December, respectively. Courtesy of Leng et al. (2024b).

The monthly spatial patterns of global  $m$  and  $V_{cmax}$  during 2001-2020 in Figure S1 and Figure S2, respectively. Strong seasonal variations in  $m$  and  $V_{cmax}$  are observed in boreal regions while  $m$  and  $V_{cmax}$  in subtropical and tropical regions are fairly constant within a year.

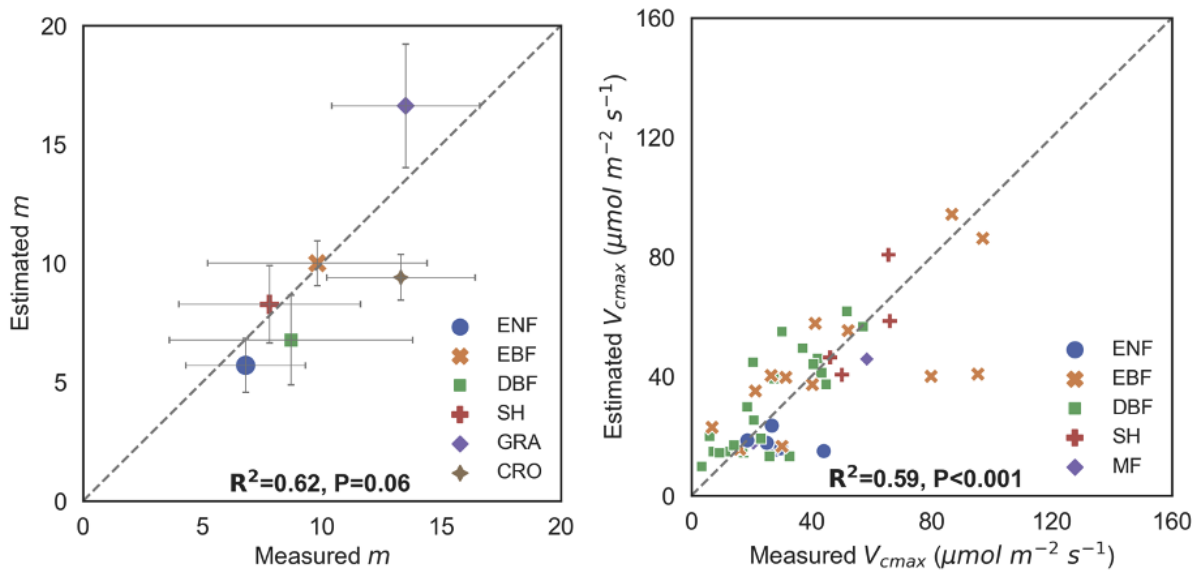

Figure S3. Left: Comparison between the PFT-scale mean values of estimated  $m$  from the Random Forest regressor and the measured  $m$  values reported in the review by Miner et al. (2017). Each horizontal and vertical bar represents the mean  $m \pm 1$  standard deviation in the

literature values and the estimated values, respectively. The sample sizes of measured  $m$  for each PFT are  $n = 23$  (ENF),  $n = 23$  (EBF),  $n = 54$  (DBF),  $n = 11$  (SH),  $n = 5$  (GRA), and  $n = 53$  (CRO). Right: Comparison between the PFT-scale mean values of predicted  $V_{cmax}$  from the Random Forest regressor and the measured  $V_{cmax}$  values reported in the review by Smith et al. (2019). Courtesy of Leng et al. (2024b).

To further validate the gridded global  $m$  and  $V_{cmax}$ , we compared the global retrievals of  $m$  and  $V_{cmax}$  in this study with the  $m$  census for various biomes from the review by Miner et al. (2017) and the  $V_{cmax}$  field measurements collected from Smith et al. (2019), as shown in Figure S3.  $m$  estimates in this study were compared with the mean and standard deviation in Miner et al. (2017) while  $V_{cmax}$  observations with the timestamp of measurement were compared with the estimated  $V_{cmax}$  in the corresponding time period in 2001-2020. Only  $0.25^\circ$  pixels with more than three  $V_{cmax}$  measurements were selected in the comparison. The estimated  $m$  in the global retrievals agrees well with the measured  $m$ , with  $R^2 = 0.62$  ( $P = 0.06$ ) and the estimated  $V_{cmax}$  in the global retrievals agrees well with the measured  $V_{cmax}$ , with  $R^2 = 0.59$  ( $P < 0.001$ ).

## References

- Baldocchi, D. (1994). An analytical solution for coupled leaf photosynthesis and stomatal conductance models. *Tree Physiology*, *14*, 1069-1079
- Ball, J.T., Woodrow, I.E., & Berry, J.A. (1987). A Model Predicting Stomatal Conductance and its Contribution to the Control of Photosynthesis under Different Environmental Conditions. In J. Biggins (Ed.), *Progress in Photosynthesis Research: Volume 4 Proceedings of the VIIth International Congress on Photosynthesis Providence, Rhode Island, USA, August 10–15, 1986* (pp. 221-224). Dordrecht: Springer Netherlands
- Chen, J., Wang, R., Liu, Y., He, L., Croft, H., Luo, X., Wang, H., Smith, N., Keenan, T., Prentice, I., Zhang, Y., Ju, W., & Dong, N. (2022). Global datasets of leaf photosynthetic capacity for ecological and earth system research. *Earth System Science Data*, *14*, 4077-4093
- Chen, J.M., Liu, J., Cihlar, J., & Goulden, M.L. (1999). Daily canopy photosynthesis model through temporal and spatial scaling for remote sensing applications. *Ecological Modelling*, *124*, 99-119
- Chen, J.M., Rich, P.M., Gower, S.T., Norman, J.M., & Plummer, S. (1997). Leaf area index of boreal forests: Theory, techniques, and measurements. *Journal of Geophysical Research: Atmospheres*, *102*, 29429-29443
- Farquhar, G.D., von Caemmerer, S., & Berry, J.A. (1980). A biochemical model of photosynthetic CO<sub>2</sub> assimilation in leaves of C<sub>3</sub> species. *Planta*, *149*, 78-90
- Leng, J., Chen, J.M., Li, W., Luo, X., Rogers, C., Croft, H., Xie, X., Staebler, R.M. (2024a). Optimizing seasonally variable photosynthetic parameters based on joint carbon and water flux constraints. Preprint at Research Square, <https://doi.org/10.21203/rs.3.rs-3832505/v1>
- Leng, J., Chen, J.M., Li, W., Luo, X., Xu, M., Rogers, C., Yan, Y. (2024b). Declining global sensitivity of photosynthesis to stomatal conductance. Preprint at Research Square, <https://doi.org/10.21203/rs.3.rs-3832529/v1>
- Medlyn, B.E., Badeck, F.W., De Pury, D.G.G., Barton, C.V.M., Broadmeadow, M., Ceulemans, R., De Angelis, P., Forstreuter, M., Jach, M.E., Kellomäki, S., Laitat, E., Marek, M., Philippot, S., Rey, A., Strassemeier, J., Laitinen, K., Liozon, R., Portier, B., Roberntz, P., Wang, K., & Jstbid, P.G. (1999). Effects of elevated [CO<sub>2</sub>] on photosynthesis in European forest species: a meta-analysis of model parameters. *Plant, Cell & Environment*, *22*, 1475-1495
- Miner, G.L., Bauerle, W.L., & Baldocchi, D.D. (2017). Estimating the sensitivity of stomatal conductance to photosynthesis: a review. *Plant, Cell & Environment*, *40*, 1214-1238
- Norman, J.M. (1982). Simulation of Microclimates. In J.L. Hatfield, & I.J. Thomason (Eds.), *Biometeorology in Integrated Pest Management* (pp. 65-99): Academic Press
- Sharkey, T.D., Bernacchi, C.J., Farquhar, G.D., & Singaas, E.L. (2007). Fitting photosynthetic carbon dioxide response curves for C<sub>3</sub> leaves. *Plant, Cell & Environment*, *30*, 1035-1040
- Smith, N.G., Keenan, T.F., Colin Prentice, I., Wang, H., Wright, I.J., Niinemets, U., Crous, K.Y., Domingues, T.F., Guerrieri, R., Yoko Ishida, F., Kattge, J., Kruger, E.L., Maire, V., Rogers, A., Serbin, S.P., Tarvainen, L., Togashi, H.F., Townsend, P.A., Wang, M., Weerasinghe, L.K., & Zhou, S.X. (2019). Global photosynthetic capacity is optimized to the environment. *Ecological Letters*, *22*, 506-517
- Wolz, K.J., Wertin, T.M., Abordo, M., Wang, D., & Leakey, A.D.B. (2017). Diversity in stomatal function is integral to modelling plant carbon and water fluxes. *Nature Ecology & Evolution*, *1*, 1292-1298
